# Supplementary material
Source: publisher figshare collection journal article supplement (https://karger.figshare.com/articles/dataset/_/3511158)
Supplement: Supplementary file 1 [file 1]

CLASSIFICATION OF DIAGNOSIS

1. Cardiovascular system
2. Congestive heart failure ( systolic, diastolic)
3. myocardial infarction ( ST elevation and non- ST elevation)
4. Chest pain/ angina ( stable, unstable)
5. Valvular abnormalities

- Aortic valve stenosis
- Aortic valve regurgitation ( insufficiency)
- Mitral valve stenosis
- Mitral valve regurgitation ( insufficiency)
- Tricuspid valve regurgitation ( insufficiency)
- Pulmonary valve abnormalities

1. Hypertension

- Urgency/emergency

1. Volume fluid overload
2. Hypotension
3. Ventricular tachycardia
4. Bradycardia
5. Atrial fibrillation/flutter
6. Supraventricular tachycardia
7. Syncope
8. Pericarditis
9. Peripheral vascular disease
10. AAA ( aortic abdominal aneurism)
11. Cardio-pulmonary arrest
12. Respiratory system
13. Acute respiratory failure ( hypoxic or hypercapnic)
14. COPD / COPD exacerbation
15. Pleural effusion
16. Pneumothorax
17. Hypoxemia
18. Pulmonary embolism
19. Empyema
20. Infections
21. Soft tissue infections ( cellulitis)
22. Joint infections
23. Bone infection
24. Pneumonia
25. Bronchitis
26. Enteritis/colitis
27. Perirectal abscess
28. Urinary tract infection
29. SIRS/Sepsis
30. Fever
31. Abscess
32. Pharyngitis
33. Cholecystitis
34. Bacteremia
35. Central nervous system
36. Encephalopathy
37. Stroke
38. Vertigo
39. Weakness
40. Headache
41. Transitional ischemic attack
42. Intracranial hemorrhages
43. Seizures
44. Genitourinary tract
45. Acute kidney Injury ( AKI)
46. Acute worsening of chronic kidney function
47. Hypokalemia
48. Hyperkalemia
49. Hypernatremia
50. Hypernatremia
51. Hypocalcaemia
52. Hypercalcemia
53. Nephrolithiasis/obstruction
54. Nephrotic syndrome
55. Volume depletion
56. Urinary retention
57. Gastrointestinal tract
58. Gastrointestinal tract bleeding
59. Gastritis/Duodenitis
60. GERD
61. Cirrhosis
62. Diverticulitis
63. Peptic ulcer disease
64. Small bowel obstruction
65. Esophagitis
66. Ischemic colitis
67. Nausea/Vomiting
68. Pancreatitis
69. Biliary colic/biliary stone/biliary duct stone
70. Abdominal pain
71. Anal abnormalities
72. Diarrhea
73. Hematology –oncology system
74. Anemia
75. Deep venous thrombosis
76. Malignancy
77. Non-gastrointestinal bleeding
78. Hematological malignancies
79. Musculosceletal
80. Hemarthrosis
81. Arthritis
82. Joint pain/postoperative pain
83. Edema of lower extremities
84. Strain/sprain
85. Gout
86. Limb wound
87. Back pain
88. Miscellaneous
89. Non-cardiac chest pain
90. Skin abrasion/toe nail avulsion
91. Anxiety
92. Eye pathology
93. Diabetes and metabolism
94. Hyperglycemia
95. Hypoglycemia
96. Diabetic ketoacidosis
97. Diabetes mellitus
98. Death
99. Dialysis

1. Initiation of renal replacement therapy

2. AV fistula placement / surgery

3. AV graft
